# Supplementary material
Source: publisher figshare collection journal article supplement (https://brill.figshare.com/ndownloader/files/40375640)
Supplement: Supplementary file 1 [file 40375640]

Appendix to

Functional traits including interspecific sociality affect mobbing behaviour in a bird community of southern China

**Demeng Jiang**a,b, **Fangyuan Hua**a **and Eben Goodale**b,c,*

a Institute of Ecology and Key Laboratory for Earth Surface Processes of the Ministry of Education, College of Urban and Environmental Sciences, Peking University, Beijing, P.R. China.

b Guangxi Key Laboratory of Forest Ecology and Conservation, College of Forestry, Guangxi University, Nanning, Guangxi, P.R. China

c Department of Health and Environmental Sciences, Xi’an Jiaotong-Liverpool University, Suzhou, Jiangsu, P.R. China

**Table A1.** Functional traits, mobbing frequency and abundance of bird species.

| Species | Scientific name | Included in analysis | Times mobbed | Times detected | Body mass (g) | Vertical strata | Intraspecific sociality | Interspecific sociality |
| --- | --- | --- | --- | --- | --- | --- | --- | --- |
| Forktailed Sunbird | *Aethopyga christinae* | Yes | 94 | 43 | 6.3 | High | 0.30 | 0.05 |
| David's Fulvetta | *Alcippe davidi* | Yes | 90 | 150 | 13.8 | Low | 0.92 | 0.67 |
| Pin-striped Tit-babbler | *Macronous gularis* | Yes | 87 | 153 | 11.2 | Low | 0.95 | 0.43 |
| Black naped Monarch | *Hypothymis azurea* | Yes | 54 | 44 | 12.2 | Low | 0.52 | 0.22 |
| White-bellied Yuhina | *Erpornis zantholeuca* | Yes | 53 | 50 | 9.7 | High | 0.90 | 0.61 |
| Yellow-bellied Warbler | *Abroscopus superciliaris* | Yes | 48 | 50 | 6.5 | High | 0.78 | 0.33 |
| Olive-backed Sunbird | *Nectarinia jugularis* | Yes | 29 | 9 | 6.33 | High | 0.73 | 0.18 |
| Rufous-capped Babbler | *Stachyris ruficeps* | Yes | 20 | 76 | 8.4 | Low | 0.83 | 0.65 |
| Hainan Blue Flycatcher | *Cyornis hainanus* | Yes | 19 | 35 | 13.9 | Low | 0.36 | 0.21 |
| Black-creasted Bulbul | *Pycnonotus melanicterus* | Yes | 18 | 22 | 63.9 | High | 0.67 | 0.00 |
| Streak-breasted Scimitar Babbler | *Pomatorhinus ruficollis* | Yes | 16 | 48 | 25.7 | Low | 0.72 | 0.42 |
| Red-whiskered Bulbul | *Pycnonotus jocosus* | Yes | 15 | 50 | 29.2 | High | 0.92 | 0.02 |
| Limestone Warbler | *Phylloscopus ricketti* | Yes | 15 | 51 | 7.1 | High | 0.74 | 0.49 |
| Sultan Tit | *Melanochlora sultanea* | Yes | 12 | 14 | 34.5 | High | 0.68 | 0.36 |
| Puff-throated Bulbul | *Alophoixus pallidus* | Yes | 12 | 73 | 48.1 | Median | 0.95 | 0.10 |
| Common Tailorbird | *Orthotomus sutorius* | Yes | 12 | 50 | 8.4 | Low | 0.69 | 0.20 |
| Striated Yuhina | *Yuhina castaniceps* | Yes | 7 | 13 | 11.3 | High | 0.99 | 0.04 |
| Brownlish-flanked Bush Warbler | *Cettia fortipes* | Yes | 7 | 9 | 9.3 | Low | 0.57 | 0.29 |
| Great Tit | *Parus major* | Yes | 6 | 10 | 17.1 | High | 0.46 | 0.15 |
| Streaked Wren-Babbler | *Napothera brevicaudata* | Yes | 5 | 30 | 24.2 | Low | 0.73 | 0.10 |
| Grey-throated Babbler | *Stachyris nigriceps* | Yes | 5 | 19 | 17.4 | Low | 0.73 | 0.48 |
| White-throated Fantail | *Rhipidura albicollis* | Yes | 3 | 17 | 8.9 | Low | 0.00 | 0.88 |
| White-browed Piculet | *Sasia ochracea* | Yes | 3 | 8 | 8.7 | Low | 0.22 | 0.56 |
| Rufescent Prinia | *Prinia rufescens* | Yes | 3 | 17 | 5.9 | Low | 0.88 | 0.36 |
| Mountain Tailorbird | *Orthotomus cucullatus* | Yes | 2 | 5 | 6.5 | Low | 0.00 | 0.75 |
| Golden-spectacled Warbler | *Seicercus burkii* | Yes | 1 | 27 | 7 | High | 0.41 | 0.81 |
| Buff-breasted Babbler | *Trichastoma yickelli* | Yes | 1 | 23 | 17.5 | Low | 0.65 | 0.18 |
| Black Bulbul | *Hypsipetes leucocephalus* | Yes | 1 | 10 | 44.1 | High | 0.97 | 0.00 |
| Bar-winged Flycatcher-shrike | *Hemipus picatus* | Yes | 1 | 5 | 9.1 | High | 0.90 | 0.2 |
| Yellow-browed Warbler | *Phylloscopus inornatus* | Yes | 0 | 6 | 5.4 | High | 0.94 | 1.00 |
| Yellow-bellied Prinia | *Prinia flaviventris* | Yes | 0 | 16 | 11.9 | Low | 0.58 | 0.00 |
| White-winged Magpie | *Urocissa whiteheadi* | Yes | 0 | 7 | 200.1 | High | 0.98 | 0.00 |
| Red-headed Trogon | *Harpactes erythrocephalus* | Yes | 0 | 6 | 89.6 | High | 0.33 | 0.17 |
| Hill Prinia | *Prinia superciliaris* | Yes | 0 | 8 | 12.1 | Low | 0.55 | 0.18 |
| Grey bushchat | *Saxicola ferreus* | Yes | 0 | 5 | 15.1 | Low | 0.92 | 0.62 |
| Crow-biled Drongo | *Dicrurus annectans* | Yes | 0 | 8 | 57.1 | High | 0.94 | 0.24 |
| Chestnut-crowned Warbler | *Seicercus castaniceps* | Yes | 0 | 14 | 5.1 | High | 0.59 | 0.95 |
| Blue-rumped Pitta | *Pitta soror* | Yes | 0 | 5 | 135 | Low | 0.40 | 0.00 |
| Black Drongo | *Pycnonotus melanicterus* | Yes | 0 | 5 | 32.3 | High | 0.77 | 0.00 |
| Bay Woodpercker | *Blythipicus pyrrhotis* | Yes | 0 | 13 | 78.1 | Median | 0.18 | 0.27 |
| Plain Flowerpeacker | *Dicaeum concolor* | No | 4 | 1 | NA | NA | NA | NA |
| White-rumped Shama | *Copsychus malabaricus* | No | 3 | 1 | NA | NA | NA | NA |
| Blyth's Leaf Warbler | *Phylloscopus reguloides* | No | 3 | 4 | NA | NA | NA | NA |
| Spot-throated Babbler | *Pellorneum albiventre* | No | 2 | 2 | NA | NA | NA | NA |
| Japanese Paradise-Flycatcher | *Terpsiphone atrocaudata* | No | 2 | 2 | NA | NA | NA | NA |
| Yellow-rumped Flycatcher | *Ficedula zanthopygia* | No | 1 | 1 | NA | NA | NA | NA |
| White-tailed Robin | *Myiomela leucura* | No | 1 | 4 | NA | NA | NA | NA |
| Verditer Flycatcher | *Eumyias thalassinus* | No | 1 | 2 | NA | NA | NA | NA |
| ultramarine flycatcher | *Ficedula superciliaris* | No | 1 | 1 | NA | NA | NA | NA |
| Grey-headed Canary-flycatcher | *Culicicapa ceylonensis* | No | 1 | 2 | NA | NA | NA | NA |
| Grey-bellied Tesia | *Tesia cyaniventer* | No | 1 | 2 | NA | NA | NA | NA |
| White-rumped Munia | *Lonchura striata* | No | 0 | 3 | NA | NA | NA | NA |
| Velvet-fronted Nuthatch | *Sitta frontalis* | No | 0 | 1 | NA | NA | NA | NA |
| Spot-necked Babbler | *Stachyris strialata* | No | 0 | 3 | NA | NA | NA | NA |
| Spangled Drongo | *Dicrurus hottentottus* | No | 0 | 4 | NA | NA | NA | NA |
| Silver Pheasant | *Lophura nycthemera* | No | 0 | 3 | NA | NA | NA | NA |
| Short-billed Minivet | *Pericrocotus brevirostris* | No | 0 | 1 | NA | NA | NA | NA |
| Scarly-breasted munia | *Lochurapunctulata topela* | No | 0 | 1 | NA | NA | NA | NA |
| Rufous-gorgeted Flycatcher | *Ficedula strophiata* | No | 0 | 1 | NA | NA | NA | NA |
| Red Junglefowl | *Gallus gallus* | No | 0 | 2 | NA | NA | NA | NA |
| Pale-footed Bush-Warbler | *Hemitesia pallidipes* | No | 0 | 1 | NA | NA | NA | NA |
| Oriental Magpie-Robin | *Copsychus saularis* | No | 0 | 1 | NA | NA | NA | NA |
| Orange-flanked Bush Robin | *Tarsiger cyanurus* | No | 0 | 4 | NA | NA | NA | NA |
| Olive-backed Pipit | *Anthus hodgsoni* | No | 0 | 3 | NA | NA | NA | NA |
| Nonggang Babbler | *Stachyris nonggangensis* | No | 0 | 4 | NA | NA | NA | NA |
| Mugimaki Fycatcher | *Ficedula mugimaki* | No | 0 | 1 | NA | NA | NA | NA |
| Long-tailed Broadbill | *Psarisomus dalhousiae* | No | 0 | 3 | NA | NA | NA | NA |
| Large Woodshrike | *Tephrodornis virgatus* | No | 0 | 3 | NA | NA | NA | NA |
| Large Scimitar Babbler | *Pomatorhinus hypoleucos* | No | 0 | 4 | NA | NA | NA | NA |
| Japanese Sparrowhawk | *Accipiter gularis* | No | 0 | 1 | NA | NA | NA | NA |
| Indochinese Green Magpie | *Cissa hypoleuca* | No | 0 | 2 | NA | NA | NA | NA |
| Green-billed Malkoha | *Phaenicophaeus tristis* | No | 0 | 3 | NA | NA | NA | NA |
| Greater Coucal | *Centropus sinensis* | No | 0 | 2 | NA | NA | NA | NA |
| Fujian Niltava | *Niltava davidi* | No | 0 | 2 | NA | NA | NA | NA |
| Emeraled Dove | *Chalcophaps indica* | No | 0 | 1 | NA | NA | NA | NA |
| Dollar Bird | *Eurystomus orientalis* | No | 0 | 1 | NA | NA | NA | NA |
| Crested Serpent-Eagle | *Spilornis cheela* | No | 0 | 1 | NA | NA | NA | NA |
| Common Stonechat | *Saxicola torquata* | No | 0 | 1 | NA | NA | NA | NA |
| Collared Owlet | *Glaucidium brodiei* | No | 0 | 15 | NA | NA | NA | NA |
| Brown Shrike | *Lanius cristatus* | No | 0 | 1 | NA | NA | NA | NA |
| Besra | *Accipiter virgatus* | No | 0 | 2 | NA | NA | NA | NA |
| Arctic Warbler | *Phylloscopus borealis* | No | 0 | 1 | NA | NA | NA | NA |

The intraspecific sociality ratio is the percentage of times the species was seen out side of a mixed-species flock in which it had more than two individuals. Interspecific sociality is the percentage of individuals that were seen in flocks. The values of functional traits for species not included in analysis were assigned to NA.
